# Supplementary material for: Transamidation of primary carboxamides, phthalimide, urea and thiourea with amines using Fe(OH)3@Fe3O4 magnetic nanoparticles as an efficient recyclable catalyst
Source: Royal Society of Chemistry journal article supplement (doi:10.1039/c5ra27680b), 2016-01-01

Electronic Supplementary Information

## **Transamidation of Primary Carboxamides, Phthalimide, Urea and Thiourea with Amines Using Fe(OH)<sub>3</sub>@Fe<sub>3</sub>O<sub>4</sub> Magnetic Nanoparticles as an Efficient Recyclable Catalyst**

*Marzban Arefi,<sup>†</sup> and Akbar Heydari,<sup>\*†</sup>*

<sup>†</sup> Chemistry Department, Tarbiat Modares University, P.O. Box 14155-4838 Tehran, Iran, Fax: (+98)-21- 82883455; phone: (+98)-21-82883444; Email: heydar\_a@modares.ac.ir

### **Table of Contents**

|                                                                                            | <b>Page</b> |
|--------------------------------------------------------------------------------------------|-------------|
| 1. General remarks                                                                         | S2          |
| 2. Experimental procedures                                                                 | S2          |
| 2.1. Preparation of the Fe(OH) <sub>3</sub> @Fe <sub>3</sub> O <sub>4</sub> catalyst       | S2          |
| 2.2. General procedure for the direct amidation of alcohols with amine hydrochloride salts | S2          |
| 3. Characterization of the corresponding amide                                             | S3          |
| 4. Copy of <sup>1</sup> H NMR, <sup>13</sup> C NMR and mass spectra of amide derivatives   | S7          |

## 1. General remarks

All experiments were carried out under argon. All chemicals and solvents were purchased from commercial suppliers and used without further purification. FT-IR spectra were obtained over the region 400–4000  $\text{cm}^{-1}$  with a Nicolet IR100 FT-IR with spectroscopic grade KBr. The powder X-ray diffraction spectrum was recorded at room temperature using a Philips X-Pert 1710 diffractometer with Co  $K\alpha$  ( $\lambda=1.79285 \text{ \AA}$ ) voltage: 40 kV, current: 40 mA and in the range 20°–80° ( $2\theta$ ) with a scan speed of 0.02°/s. The morphology of catalyst was studied with scanning electron microscopy using SEM (Philips XL 30 and S-4160) on gold coated samples. The magnetic properties of  $\text{Fe}(\text{OH})_3@ \text{Fe}_3\text{O}_4$  were obtained by a vibrating magnetometer/Alternating Gradient Force Magnetometer (VSM/AGFM, MDK Co., Iran, [www.mdk-magnetic.com](http://www.mdk-magnetic.com)). Transmission electron microscopy (TEM) were carried out at 120 kV (Philips model CM120). Thermal gravimetric analysis (TGA) was performed on a Thermal Analyzer with a heating rate of 20  $^\circ\text{C min}^{-1}$  over a temperature range of 25–1100  $^\circ\text{C}$  under flowing compressed  $\text{N}_2$ .  $^1\text{H}$  NMR and  $^{13}\text{C}$  NMR spectra were recorded on a Bruker Avance (DRX 400 MHz and DRX 500 MHz) in pure deuterated  $\text{CDCl}_3$  solvent with tetramethylsilane (TMS) as internal standard.

## 2. Experimental procedures

### 2.1. Preparation of the $\text{Fe}(\text{OH})_3@ \text{Fe}_3\text{O}_4$ catalyst

The synthesis of the  $\text{Fe}(\text{OH})_3@ \text{Fe}_3\text{O}_4$  catalyst was conducted according to the procedure previously reported. In a typical preparation procedure, the mixture of 4.0 mmol  $\text{FeCl}_3 \cdot 6\text{H}_2\text{O}$  and 2.0 mmol  $\text{FeCl}_2 \cdot 4\text{H}_2\text{O}$  salts in 40.0 mL of deionized water under vigorous stirring. An ammonia solution (25% (w/w)) was added in dropwise manner over 5 min to the stirring mixture to maintain the reaction  $\text{pH}$  about 11. The resulting black dispersion was stirred vigorously for 1h at room temperature and then was refluxed for 1h.  $\text{Fe}_3\text{O}_4$  nanoparticles were magnetically gathered and the residue was repeatedly washed with water and ethanol. Subsequently, as-prepared  $\text{Fe}_3\text{O}_4$  nanoparticles and 15.0 mmol of  $\text{FeCl}_3 \cdot 6\text{H}_2\text{O}$  were ultrasonically dispersed into 10.0 mL of ethanol. After totally dissolution and dispersion, the nanoparticles were separated from the ethanol solution by magnetic decantation and dried at 80  $^\circ\text{C}$  for 4h.  $\text{Fe}(\text{OH})_3@ \text{Fe}_3\text{O}_4$  nanoparticles were obtained by dropwise addition of aqueous ammonia (25% (w/w), 5 mL) to the dried brown nanoparticles under vigorous stirring. Finally, the products of  $\text{Fe}(\text{OH})_3@ \text{Fe}_3\text{O}_4$  were magnetically separated, washed with water, and dried in an oven at 373 K overnight for further usage.

### 2.2. General Procedure for the transamidation

To a mixture of catalyst (30.0 mg, 2.6 mol%) and amine (1.0 mmol) in *p*-xylene (1.0 mL) were added amide (1.0 mmol) under argon atmosphere, and the mixture was refluxed for 10 h. After

completion of reaction, the reaction mixture was allowed to cool to room temperature. It was then diluted with EtOAc and the catalyst was separated from the reaction mixture by using an external magnet and washing twice with EtOAc, all volatiles were removed under vacuum, and the resulting residue was purified by column chromatography on silica gel to afford the desired product.

### 3. Characterization of the corresponding amide

#### *N*-benzylformamide 3a

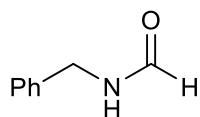

Isolated yield = 92% (87%); IR (KBr):  $\nu$  ( $\text{cm}^{-1}$ ) = 3277, 3047, 1644, 1534, 1456, 1387, 1230; MS (EI, 70 eV):  $m/z$  (%) = 135 ( $\text{M}^+$ , 80), 118 (10), 106 (73), 91 (100), 79 (57), 77 (51), 67 (27), 57 (8).

#### *N*-phenylformamide 3b

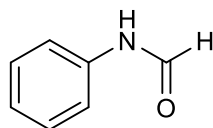

Isolated yield = 88% (81%); IR (KBr):  $\nu$  ( $\text{cm}^{-1}$ ) = 3267, 3063, 2876, 1684, 1601, 1541, 1439, 1305, 1147; MS (EI, 70 eV):  $m/z$  (%) = 121 ( $\text{M}^+$ , 100), 93 (75), 77 (4), 66 (31).

#### *N*-(1-phenylethyl)formamide 3c

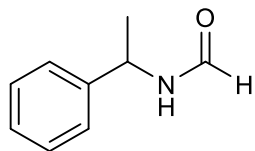

Isolated yield = 82% (80%); IR (KBr):  $\nu$  ( $\text{cm}^{-1}$ ) = 3279, 3044, 2978, 2865, 1668, 1530, 1382, 1262, 1088; MS (EI, 70 eV):  $m/z$  (%) = 149 ( $\text{M}^+$ , 100), 134 (67), 119 (14), 105 (79), 91 (10), 84 (92), 79 (68), 77 (62), 72 (5).

#### *N*-*p*-tolylformamide 3d

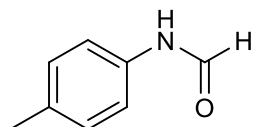

Isolated yield = 91% (84%); IR (KBr):  $\nu$  ( $\text{cm}^{-1}$ ) = 3190, 3035, 2921, 1684, 1516, 1398, 1300, 1040; MS (EI, 70 eV):  $m/z$  (%) = 301 ( $\text{M}^+$ , 10), 135 (86), 106 (100), 91 (5), 77 (30).

### ***N*-(4-methoxyphenyl)formamide 3e**

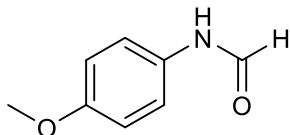

Isolated yield = 89% (88%); IR (KBr):  $\nu$  ( $\text{cm}^{-1}$ ) = 3243, 3152, 2893, 1656, 1548, 1509, 1386, 1237, 1025; MS (EI, 70 eV):  $m/z$  (%) = 151 ( $\text{M}^+$ , 87), 136 (14), 122 (57), 108 (100), 95 (40), 80 (85).

### ***N*-(4-bromophenyl)formamide 3f**

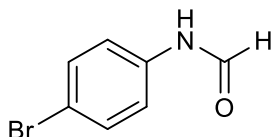

Isolated yield = 80% (75%); IR (KBr):  $\nu$  ( $\text{cm}^{-1}$ ) = 3258, 3050, 2868, 1671, 1591, 1531, 1390, 1302, 1063; MS (EI, 70 eV):  $m/z$  (%) = 199 ( $\text{M}^+$ , 100), 171 (66), 119 (3), 92 (41), 65 (50).

### ***N*-benzylacetamide 3i**

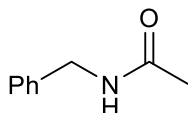

Isolated yield = 87%;  $^1\text{H}$  NMR (400 MHz,  $\text{CDCl}_3$ ):  $\delta_{\text{H}}$  (ppm) = 7.30-7.37 (m, 5H), 5.83 (br s, 1H), 4.45 (s, 2H), 2.05 (s, 3H).;  $^{13}\text{C}$ -NMR (100 MHz,  $\text{CDCl}_3$ ):  $\delta_{\text{C}}$  (ppm) = 169.9, 138.2, 128.7, 127.9, 127.6, 43.8, 23.3; IR (KBr):  $\nu$  ( $\text{cm}^{-1}$ ) = 3290, 3084, 2928, 2854, 1640, 1550, 1441, 1366, 1025; MS (EI, 70 eV):  $m/z$  (%) = 149 ( $\text{M}^+$ , 100), 106 (82), 91 (25), 77 (12).

### ***N*-phenylacetamide 3j**

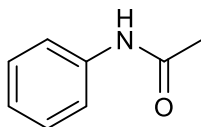

Isolated yield = 70%;  $^1\text{H}$  NMR (500 MHz,  $\text{DMSO-d}_6$ ):  $\delta_{\text{H}}$  (ppm) = 9.92 (s, 1H), 7.57 (d,  $J$  = 7.5 Hz, 2H), 7.27 (t,  $J$  = 7.5 Hz, 2H), 7.00 (t,  $J$  = 7.5 Hz, 1H), 2.03 (s, 6H).; IR (KBr):  $\nu$  ( $\text{cm}^{-1}$ ) = 3292, 1665, 1606, 1546, 1432, 1029; MS (EI, 70 eV):  $m/z$  (%) = 135 ( $\text{M}^+$ , 85), 119 (3), 93 (100), 77 (12), 65 (60), 57 (4).

### ***N*-(1-phenylethyl)acetamide 3k**

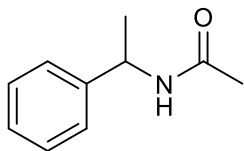

Isolated yield = 67%;  $^1\text{H NMR}$  (400 MHz,  $\text{CDCl}_3$ ):  $\delta_{\text{H}}$  (ppm) = 7.28-7.40 (m, 5H), 5.79 (br s, 1H), 5.16 (q,  $J = 8.0$  Hz, 1H), 2.02 (s, 3H), 1.52 (d,  $J = 8.0$  Hz, 3H);  $^{13}\text{C-NMR}$  (100 MHz,  $\text{CDCl}_3$ ):  $\delta_{\text{C}}$  (ppm) = 169.1, 143.1, 128.7, 127.4, 126.2, 48.9, 23.5, 21.7; IR (KBr):  $\nu$  ( $\text{cm}^{-1}$ ) = 3264, 3067, 2925, 1644, 1549, 1445, 1373 1027; MS (EI, 70 eV):  $m/z$  (%) = 163 ( $\text{M}^+$ , 37), 148 (37), 120 (56), 106 (100), 77 (48).

### ***N*-(*p*-tolyl)acetamide 3l**

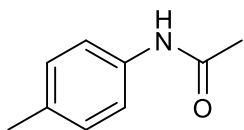

Isolated yield = 77%;  $^1\text{H NMR}$  (400 MHz,  $\text{CDCl}_3$ ):  $\delta_{\text{H}}$  (ppm) = 9.41 (br s, 1H), 7.67 (d,  $J = 8.0$  Hz, 2H), 7.51 (m,  $J = 8.0$  Hz, 2H), 2.91 (s, 3H), 2.08 (s, 3H); IR (KBr):  $\nu$  ( $\text{cm}^{-1}$ ) = 3284, 3122, 2942, 1662, 1529, 1314, 1027; MS (EI, 70 eV):  $m/z$  (%) = 149 ( $\text{M}^+$ , 70), 107 (100), 106 (97), 91 (3), 77 (17).

### ***N*-(4-methoxyphenyl)acetamide 3m**

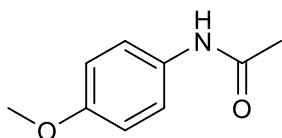

Isolated yield = 79%; IR (KBr):  $\nu$  ( $\text{cm}^{-1}$ ) = 3247, 3071, 2925, 1653, 1510, 1409, 1240, 1026; MS (EI, 70 eV):  $m/z$  (%) = 165 ( $\text{M}^+$ , 72), 149 (16), 123 (80), 108 (100), 95 (17), 91 (10), 80 (27).

### ***N*-(4-bromophenyl)acetamide 3n**

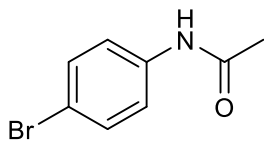

Isolated yield = 64%; IR (KBr):  $\nu$  ( $\text{cm}^{-1}$ ) = 3297, 3187, 1671, 1595, 1532, 1484, 1388, 1305, 1004; MS (EI, 70 eV):  $m/z$  (%) = 213 ( $\text{M}^+$ , 77), 178 (100), 145 (12), 143 (12), 119 (6), 92 (67), 91 (36), 65 (46).

### 1,3-diphenylurea **3o**

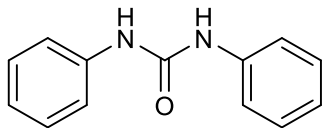

Isolated yield = 64%; IR (KBr):  $\nu$  ( $\text{cm}^{-1}$ ) = 3323, 1645, 1599, 1549, 1439, 1306, 1230; MS (EI, 70 eV):  $m/z$  (%) = 212 ( $\text{M}^+$ , 82), 119 (5), 93 (100), 92 (15), 77 (14).

### 1,3-dibenzylurea **3p**

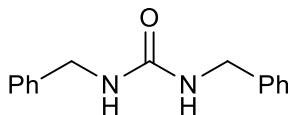

Isolated yield = 71%; IR (KBr):  $\nu$  ( $\text{cm}^{-1}$ ) = 3328, 3029, 2922, 2870, 1620, 1450, 1252, 1099; MS (EI, 70 eV):  $m/z$  (%) = 240 ( $\text{M}^+$ , 37), 149 (29), 106 (100), 91 (67), 79 (22), 77 (17).

### 1,3-di-*p*-tolylurea **3q**

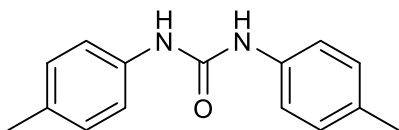

Isolated yield = 85%; IR (KBr):  $\nu$  ( $\text{cm}^{-1}$ ) = 3308, 2924, 1641, 1564, 1409, 1241; MS (EI, 70 eV):  $m/z$  (%) = 240 ( $\text{M}^+$ , 85), 150 (10), 133 (20), 107 (100), 106 (97), 91 (32), 77 (61).

### 1,3-bis(1-phenylethyl)urea **3r**

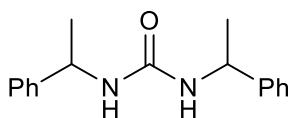

Isolated yield = 82%;  $^1\text{H}$  NMR (400 MHz,  $\text{CDCl}_3$ ):  $\delta_{\text{H}}$  (ppm) = 7.27-7.31 (m, 10H), 5.99 (br s, 2H), 4.79 (q,  $J$  = 8.0 Hz, 2H), 1.43 (d,  $J$  = 8.0 Hz, 6H); IR (KBr):  $\nu$  ( $\text{cm}^{-1}$ ) = 3329, 2969, 1626, 1575, 1447, 1248, 1115; MS (EI, 70 eV):  $m/z$  (%) = 268 ( $\text{M}^+$ , 91), 253 (5), 163 (20), 149 (7), 120 (100), 106 (100), 105 (96), 91 (10), 77 (60).

### 1,3-bis(4-methoxyphenyl)urea **3s**

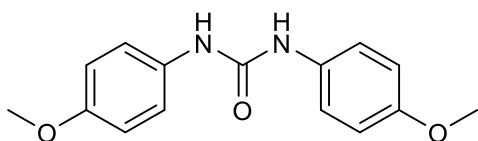

Isolated yield = 58%; IR (KBr):  $\nu$  ( $\text{cm}^{-1}$ ) = 3449, 2927, 1716, 1613, 1516, 1387, 1254, 1104; MS (EI, 70 eV):  $m/z$  (%) = 272 ( $\text{M}^+$ , 1), 253 (100), 238 (80), 210 (21), 130 (22), 106 (21), 76 (42).

### 1,3-diphenylthiourea 3v

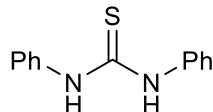

Isolated yield = 58%;  $^1\text{H}$  NMR (500 MHz,  $\text{DMSO-d}_6$ ):  $\delta_{\text{H}}$  (ppm) = 9.79 (s, 2H), 7.47 (t,  $J=7.5$  Hz, 2H), 7.32 (t,  $J=7.5$ , 2H), 7.11 (t,  $J=7.5$ , 1H); IR (KBr):  $\nu$  ( $\text{cm}^{-1}$ ) = 3204, 3020, 1545, 1449, 1339, 1234, 1068.

### 2-phenyl isoindoline-1,3-dione 3w

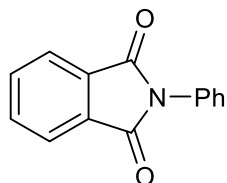

Isolated yield = 70%;  $^1\text{H}$  NMR (400 MHz,  $\text{CDCl}_3$ ):  $\delta_{\text{H}}$  (ppm) = 7.99-8.01 (m, 2H), 7.82-7.84 (m, 2H), 7.47-7.55 (m, 5H); IR (KBr):  $\nu$  ( $\text{cm}^{-1}$ ) = 3457, 1709, 1497, 1384, 1112; MS (EI, 70 eV):  $m/z$  (%) = 223 ( $\text{M}^+$ , 85), 209 (20), 179 (100), 152 (31), 130 (22), 104 (79), 91 (46), 77 (77).

## 4. Copy of $^1\text{H}$ NMR, $^{13}\text{C}$ NMR and mass spectra of amide derivatives

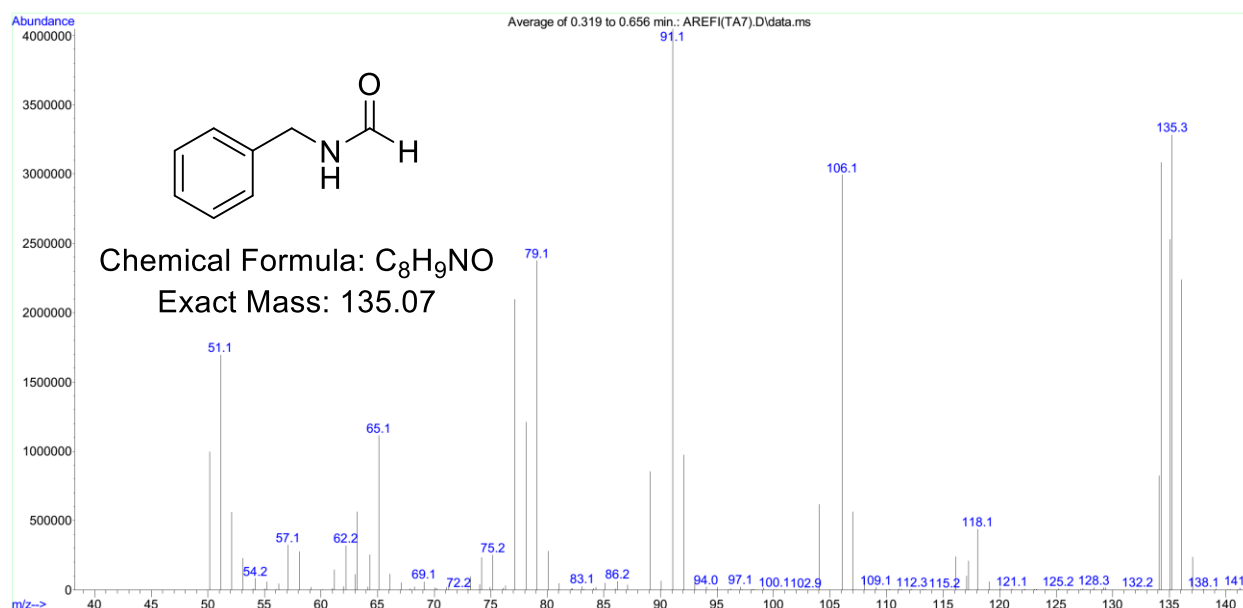

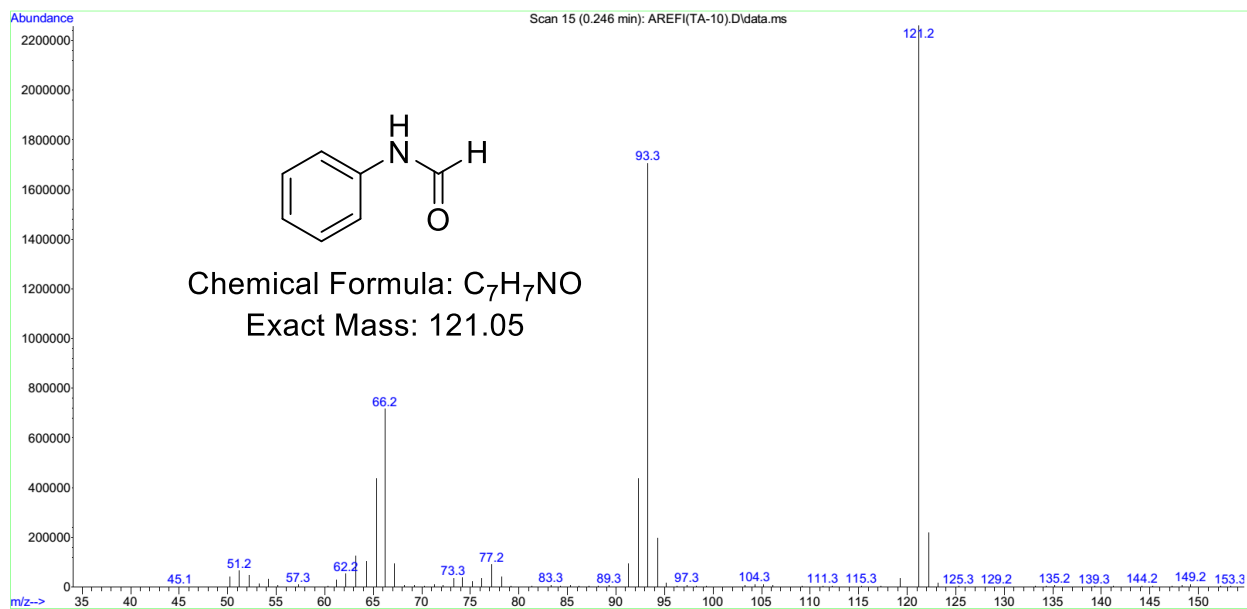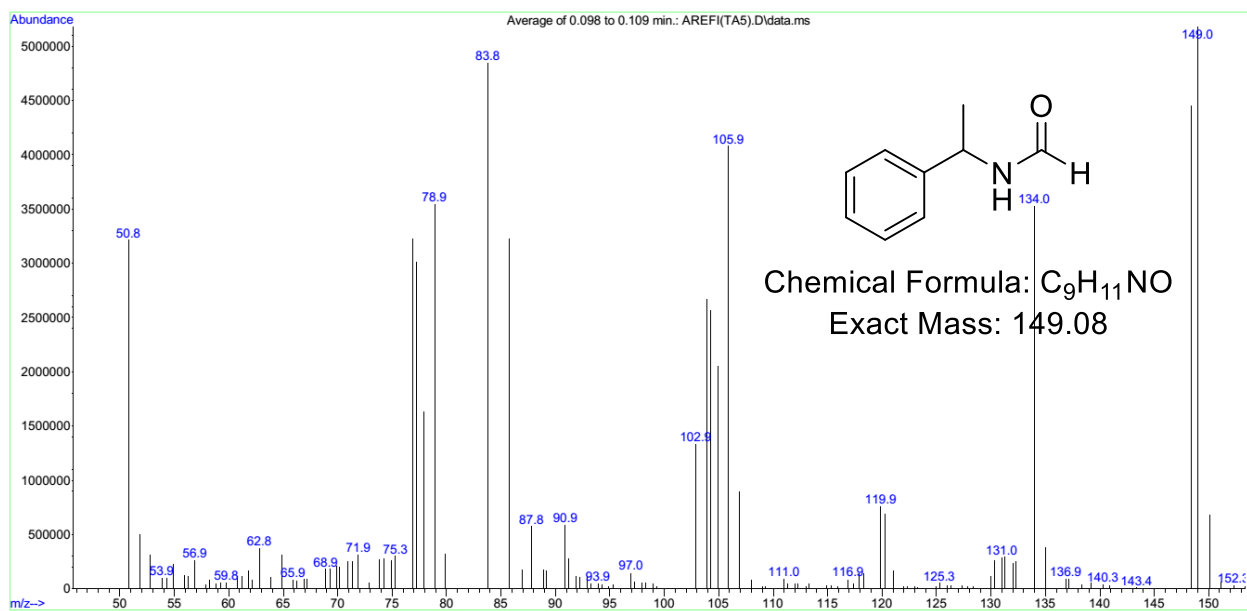



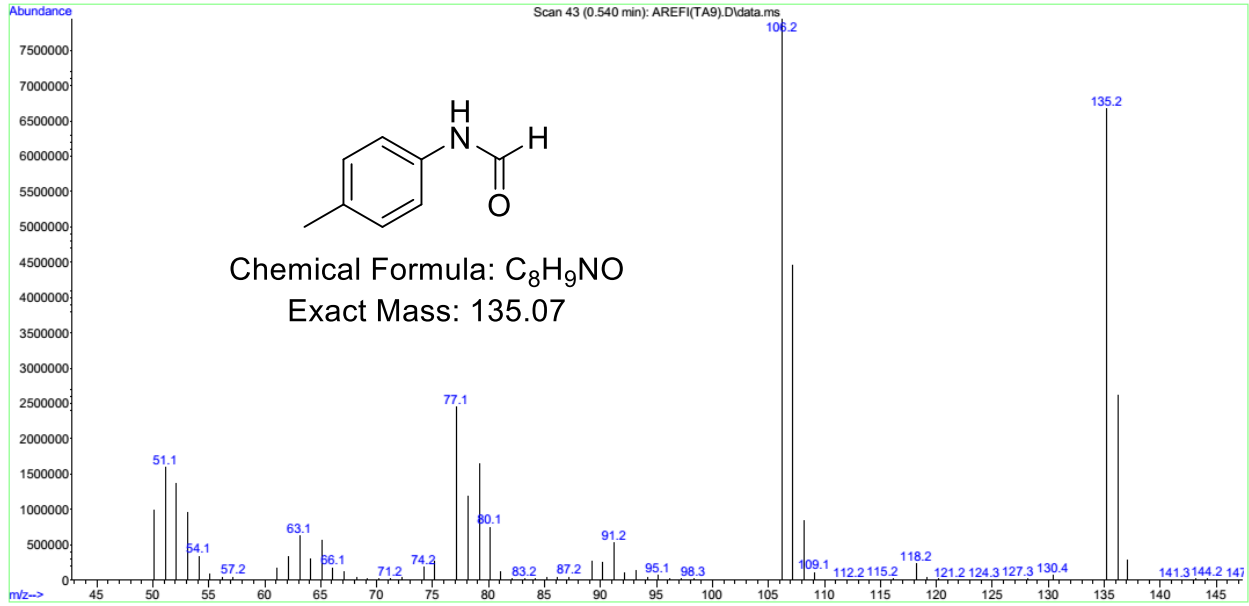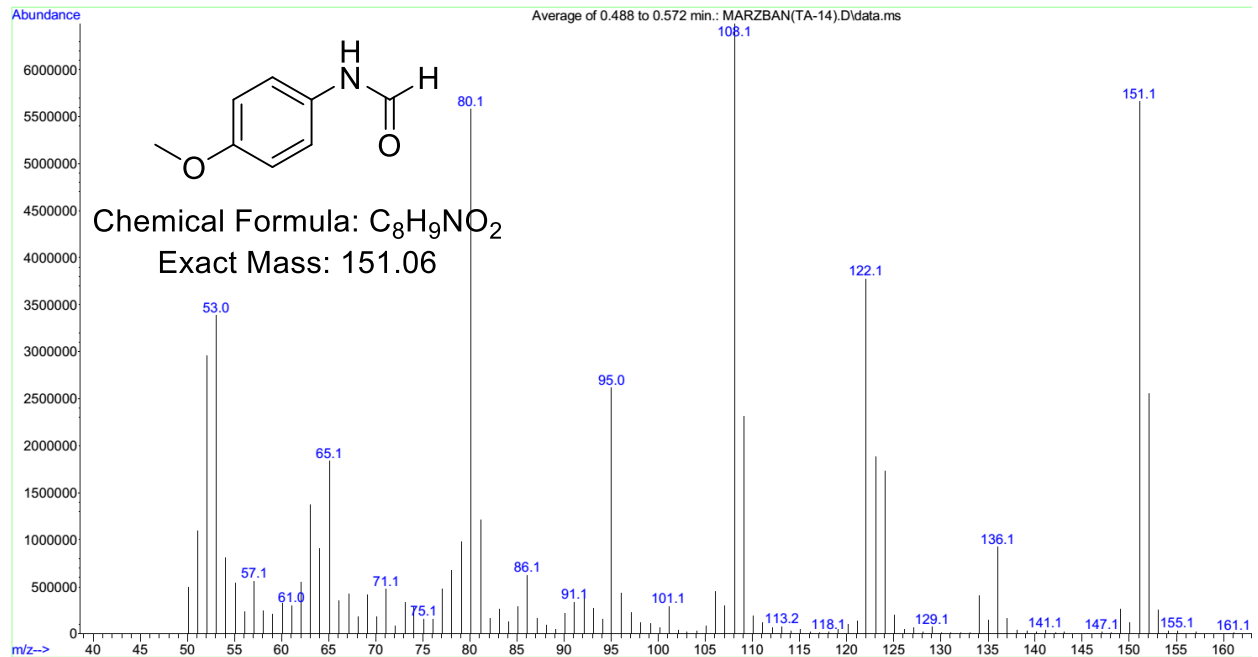

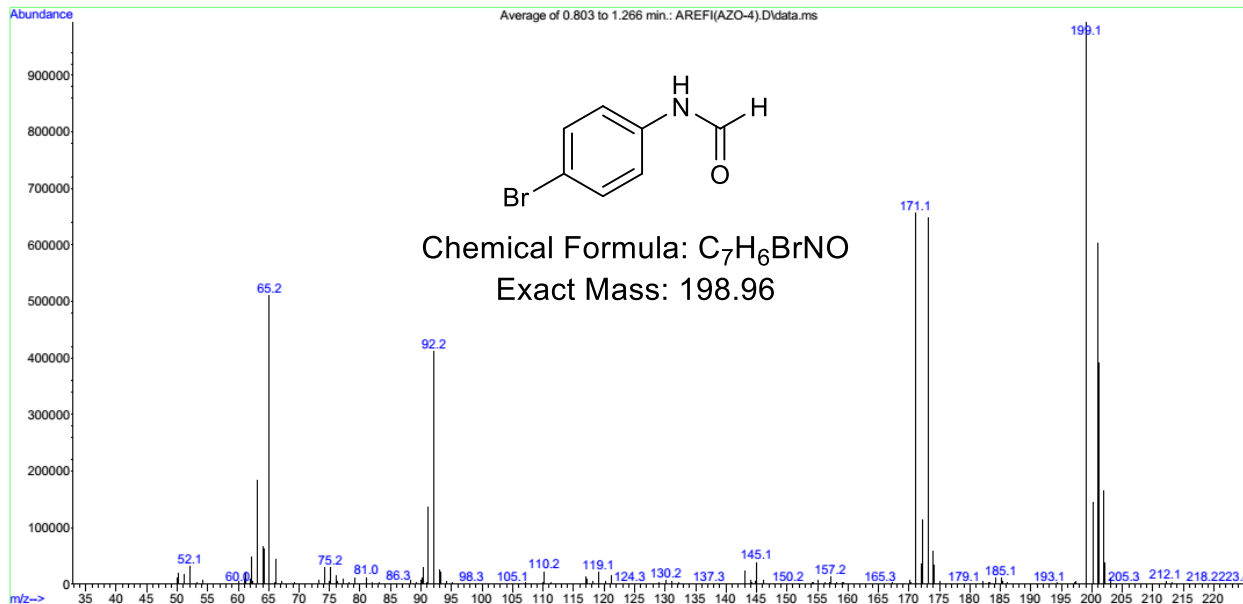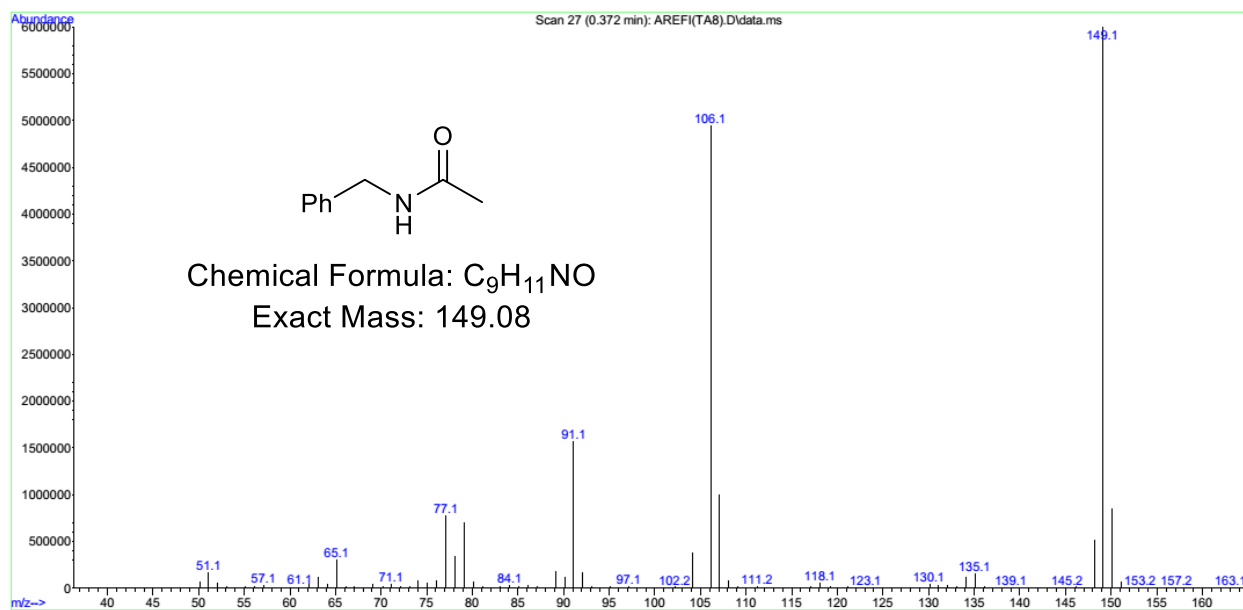

NMR  
Sample code: Ta8

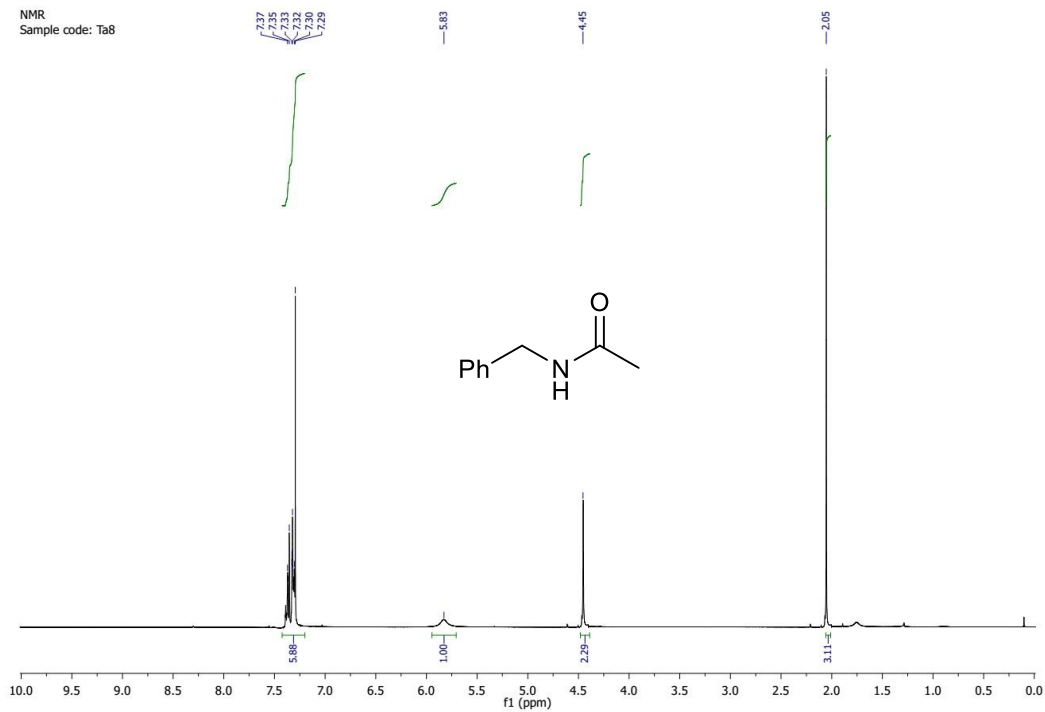

NMR  
Sample code: Ta8

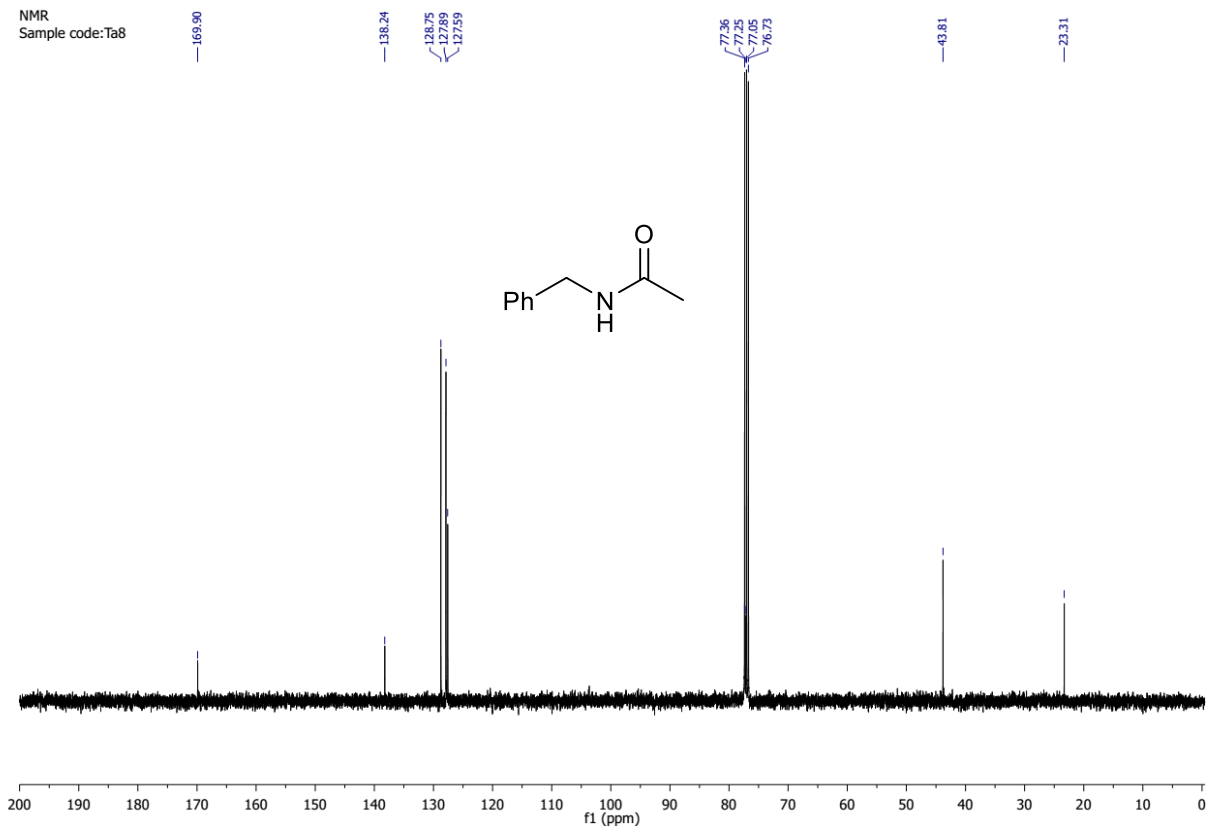

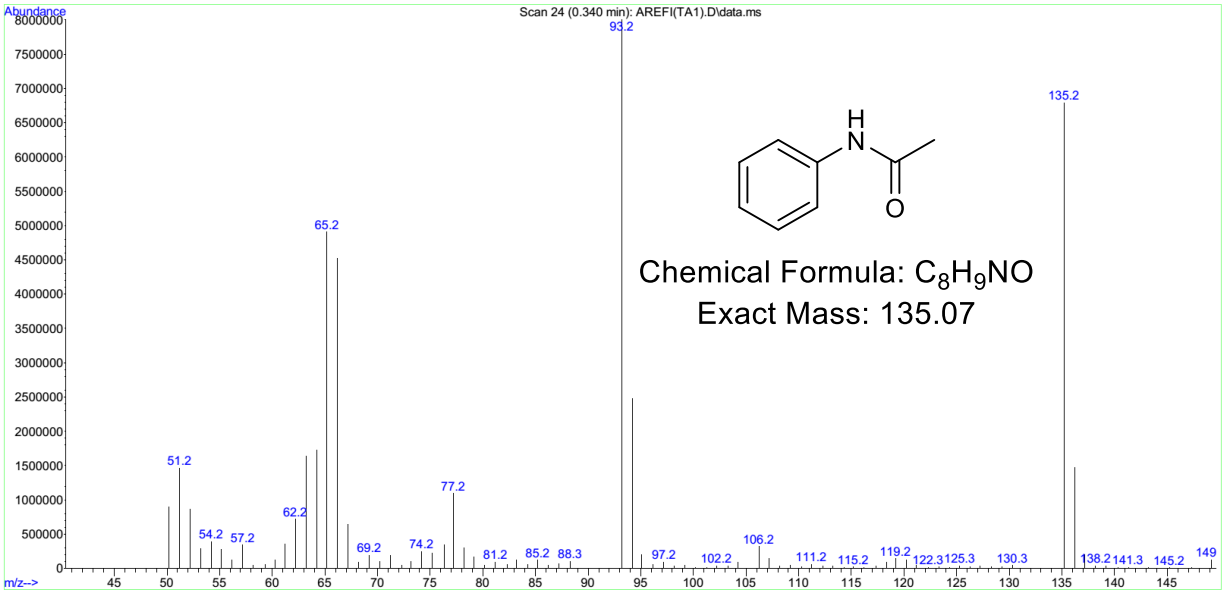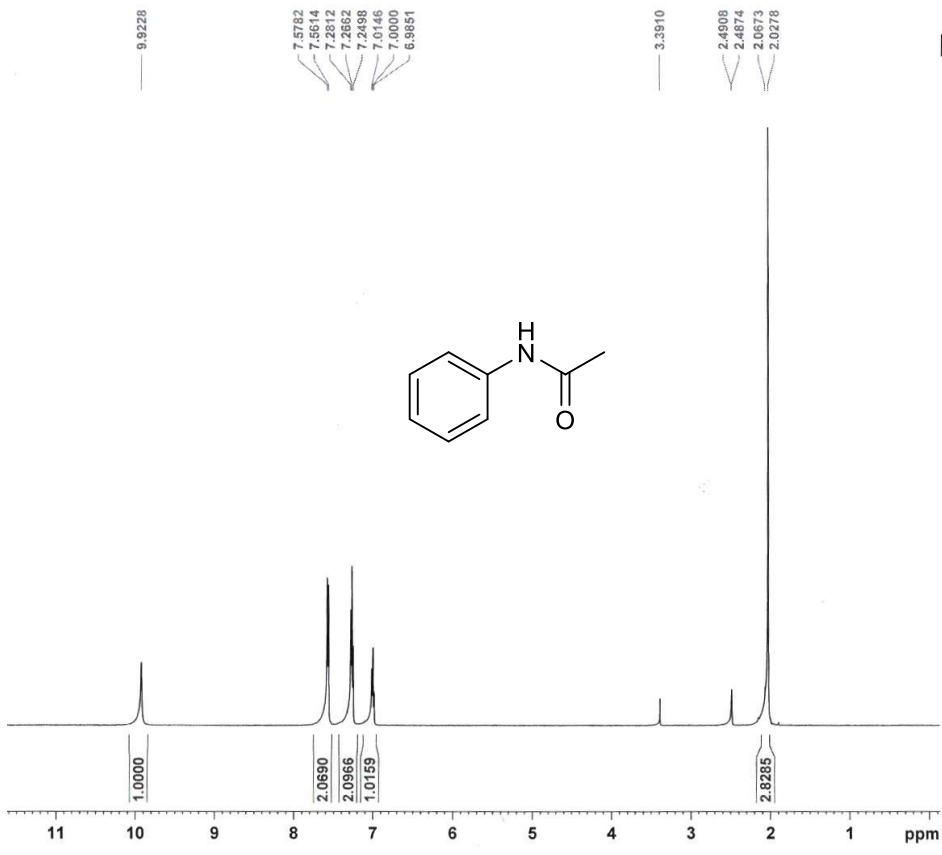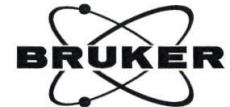

Current Data Parameters  
NAME Arefi  
EXPNO 2  
PROCNO 1

F2 - Acquisition Parameters  
Date\_ 800204  
Time\_ 6.47  
INSTRUM spect  
PROBHD 5 mm Multinucl  
PULPROG zg  
TD 32768  
SOLVENT DMSO  
NS 8  
DS 0  
SWE 10330.578 Hz  
FIDRES 0.315264 Hz  
AQ 1.5860696 sec  
RG 456.1  
DW 48.400 usec  
DE 6.00 usec  
TE 300.0 K  
D1 6.0000000 sec  
TD0 1

===== CHANNEL f1 =====  
NUC1 1H  
P1 15.00 usec  
PL1 1.00 dB  
SFO1 500.1330885 MHz

F2 - Processing parameters  
SI 32768  
SF 500.1300101 MHz  
WDW EM  
SSB 0  
LB 0.30 Hz  
GB 0  
PC 1.00

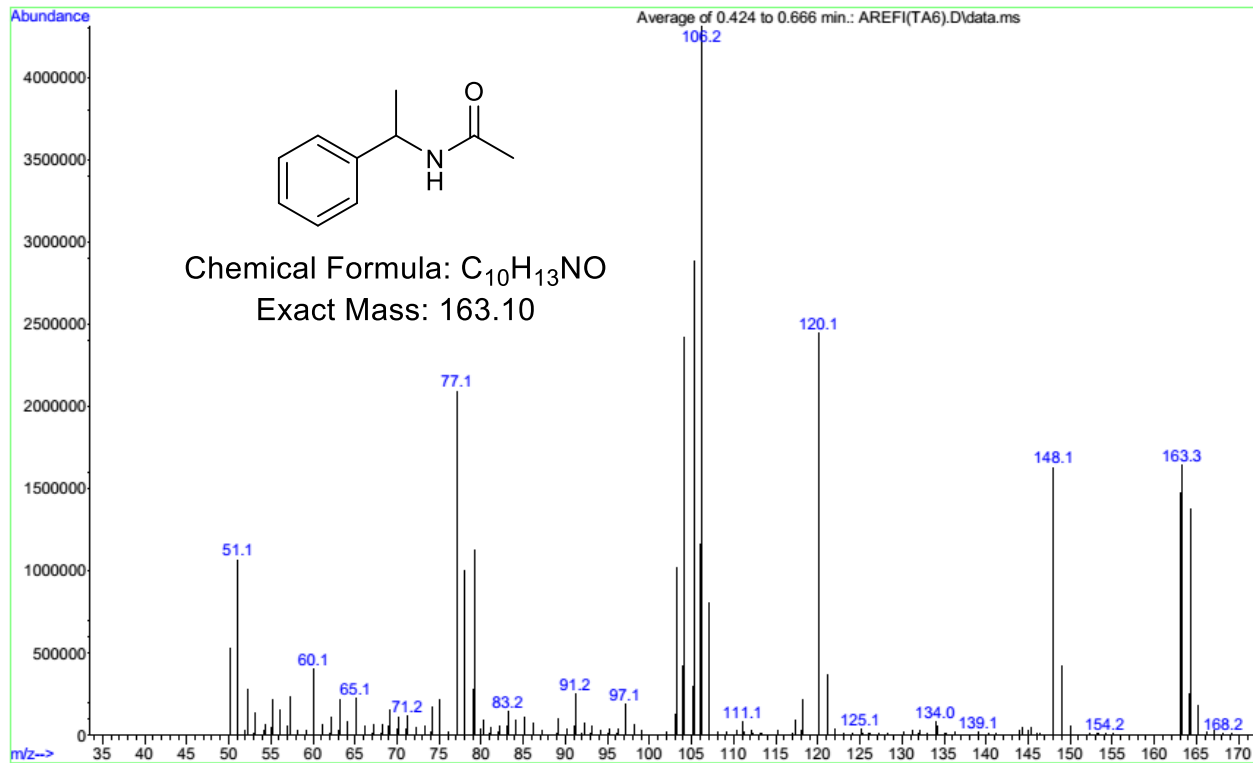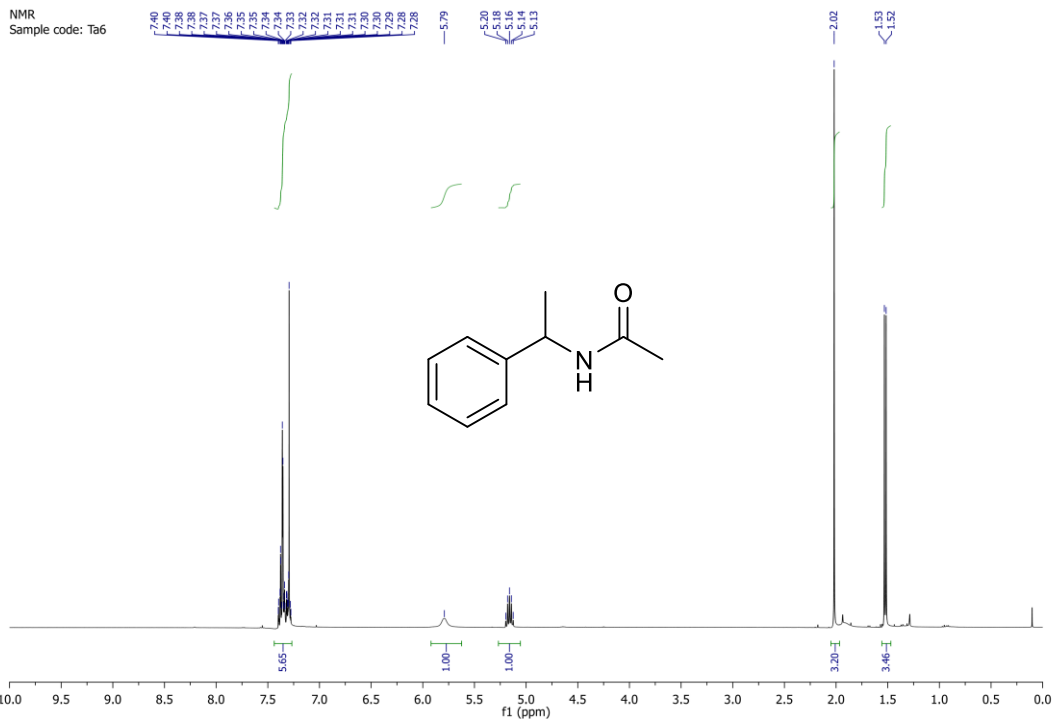

NMR  
Sample code: Ta6

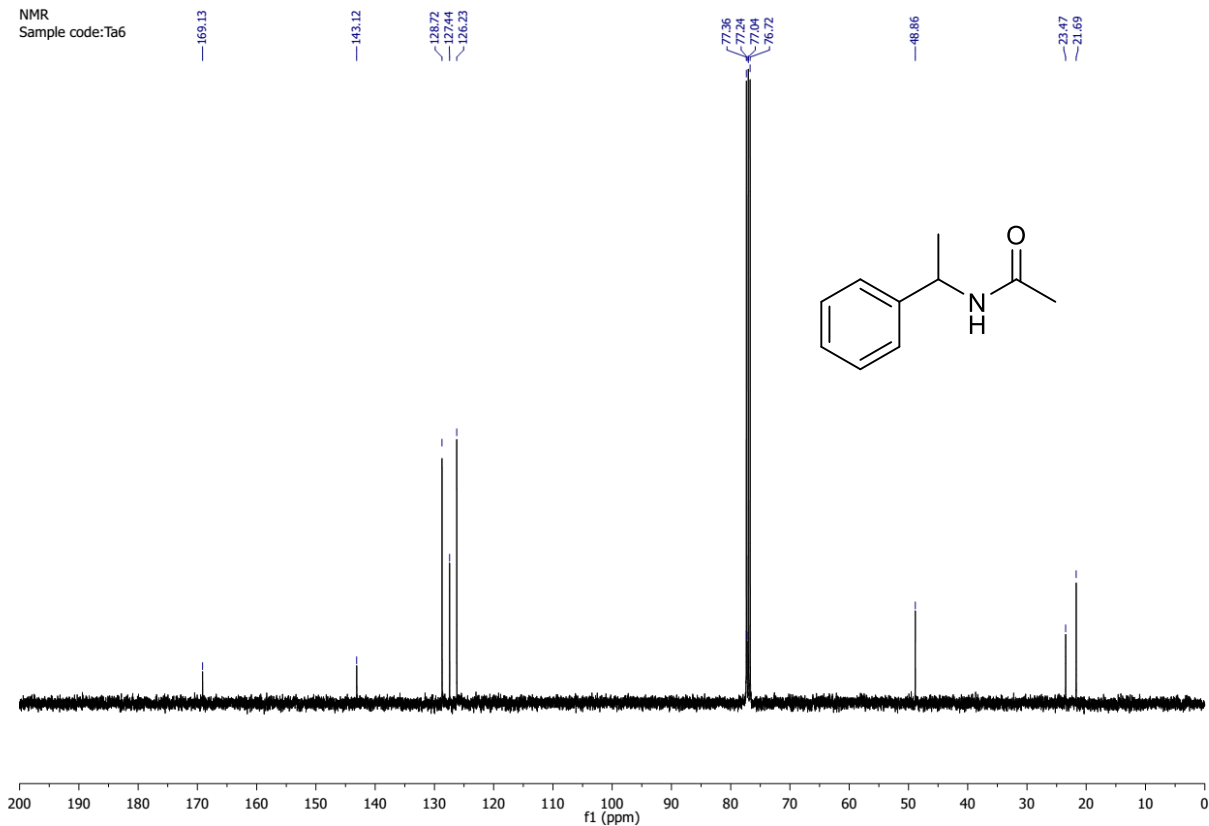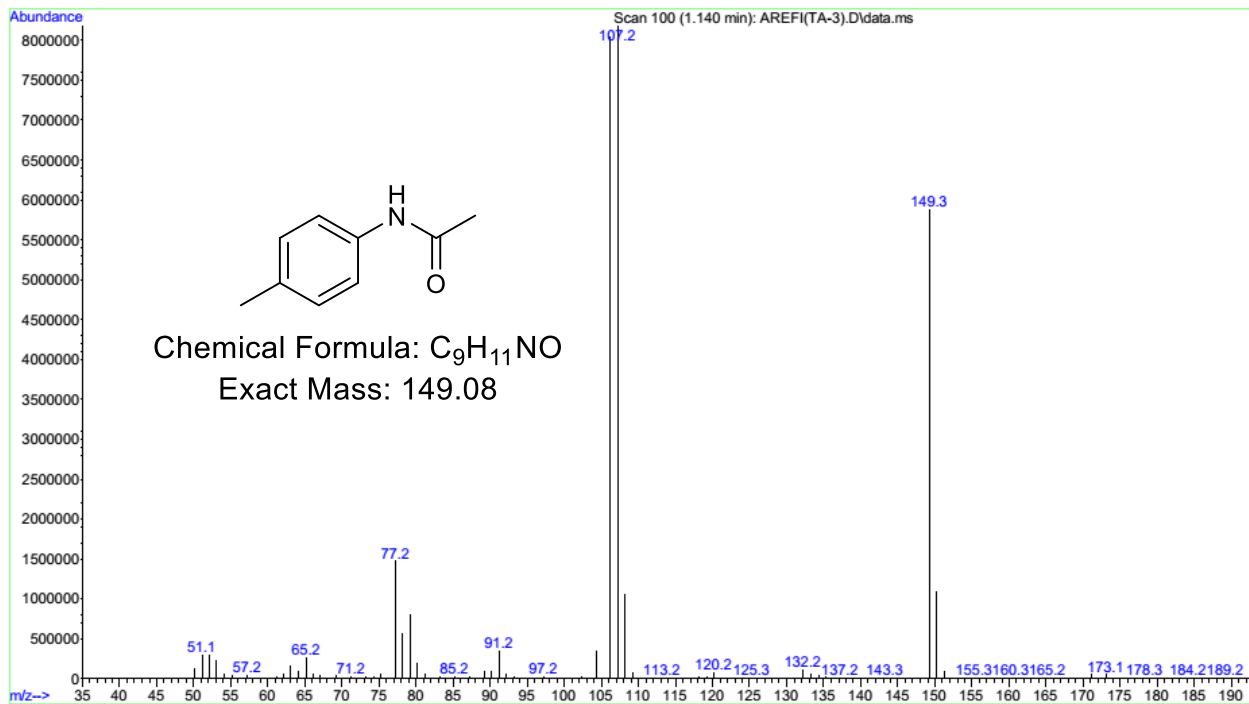

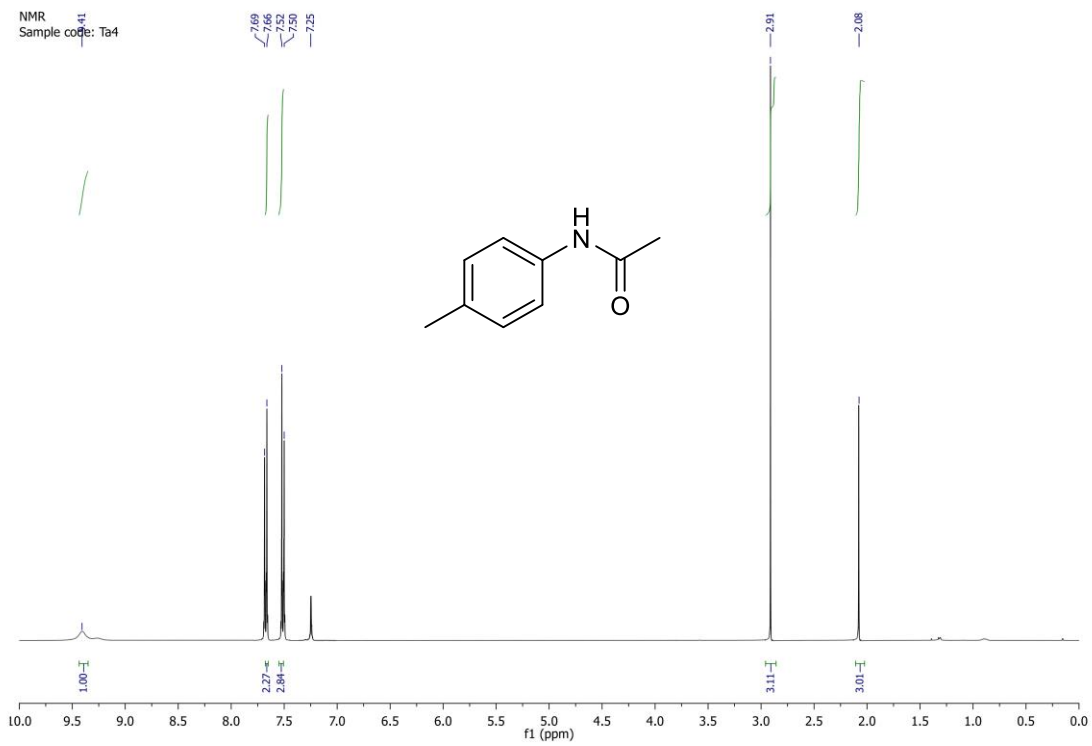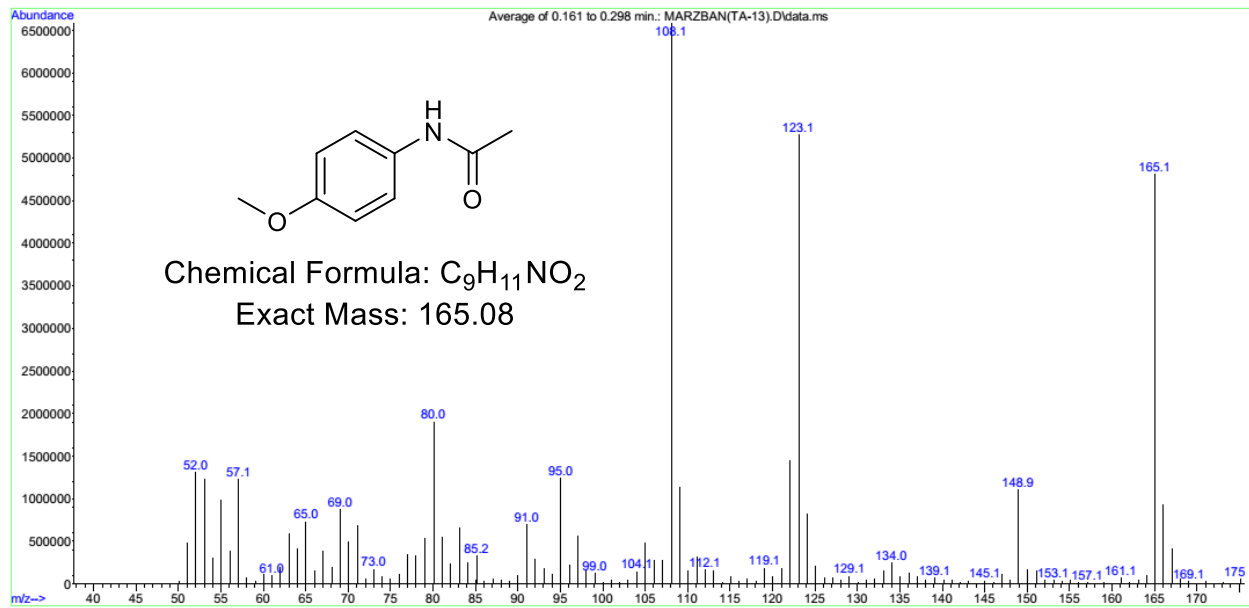

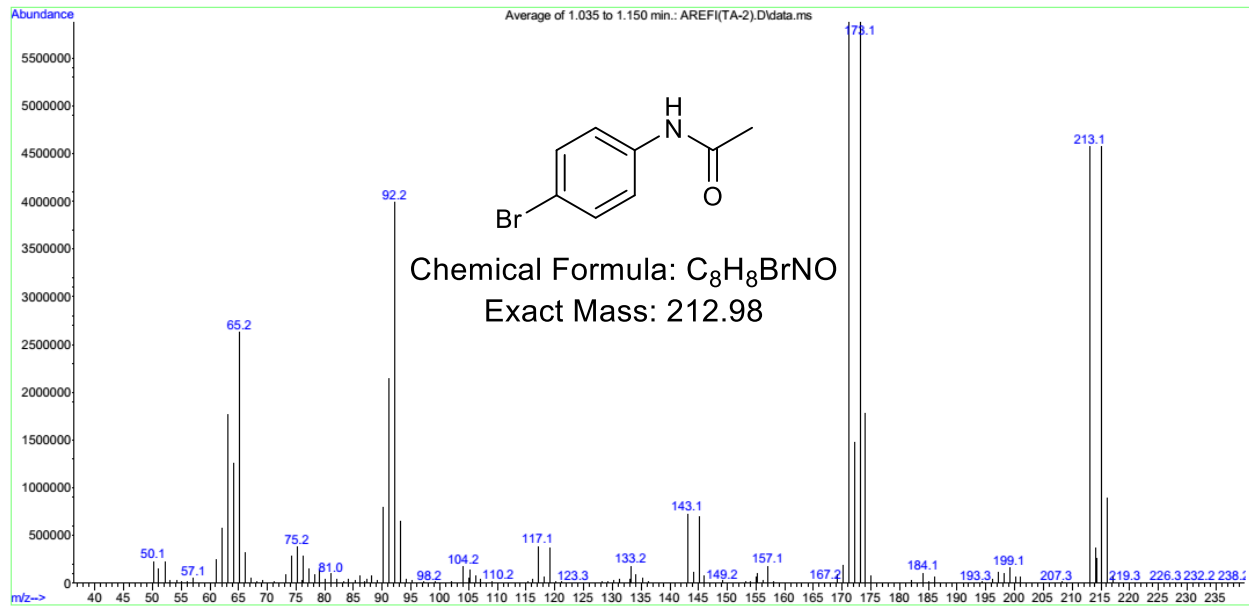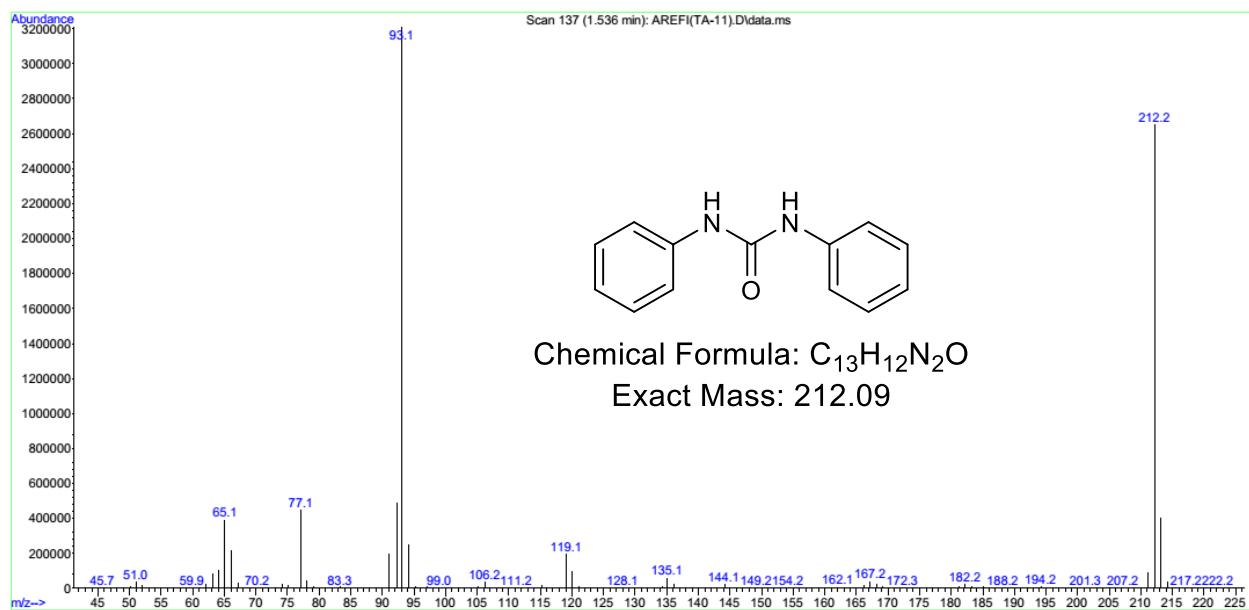



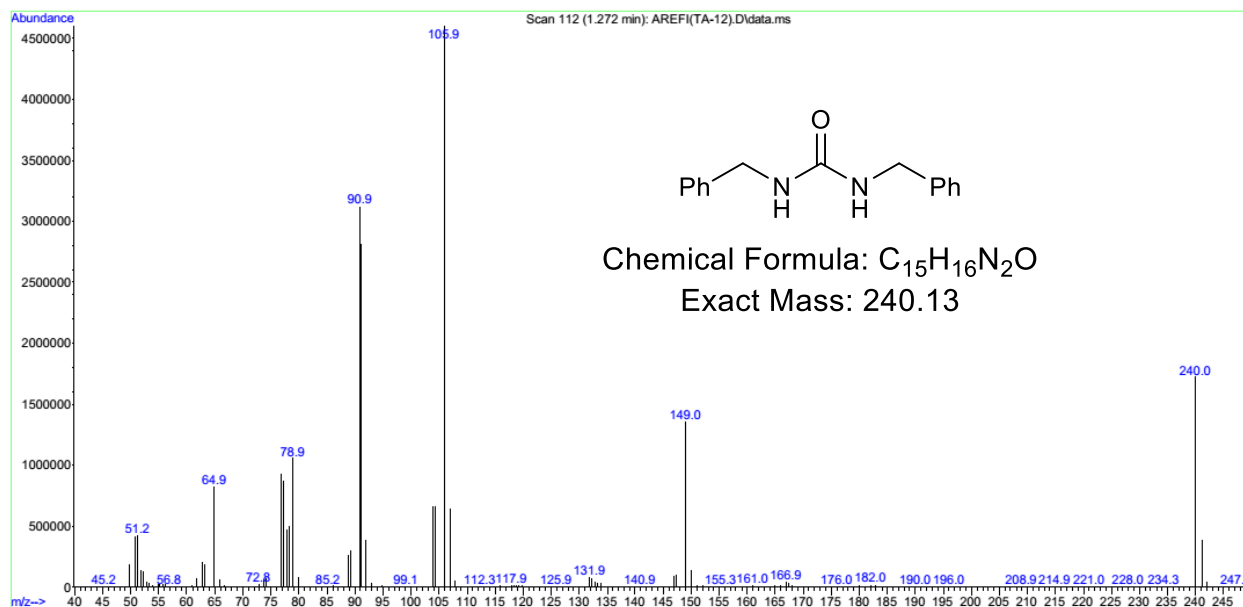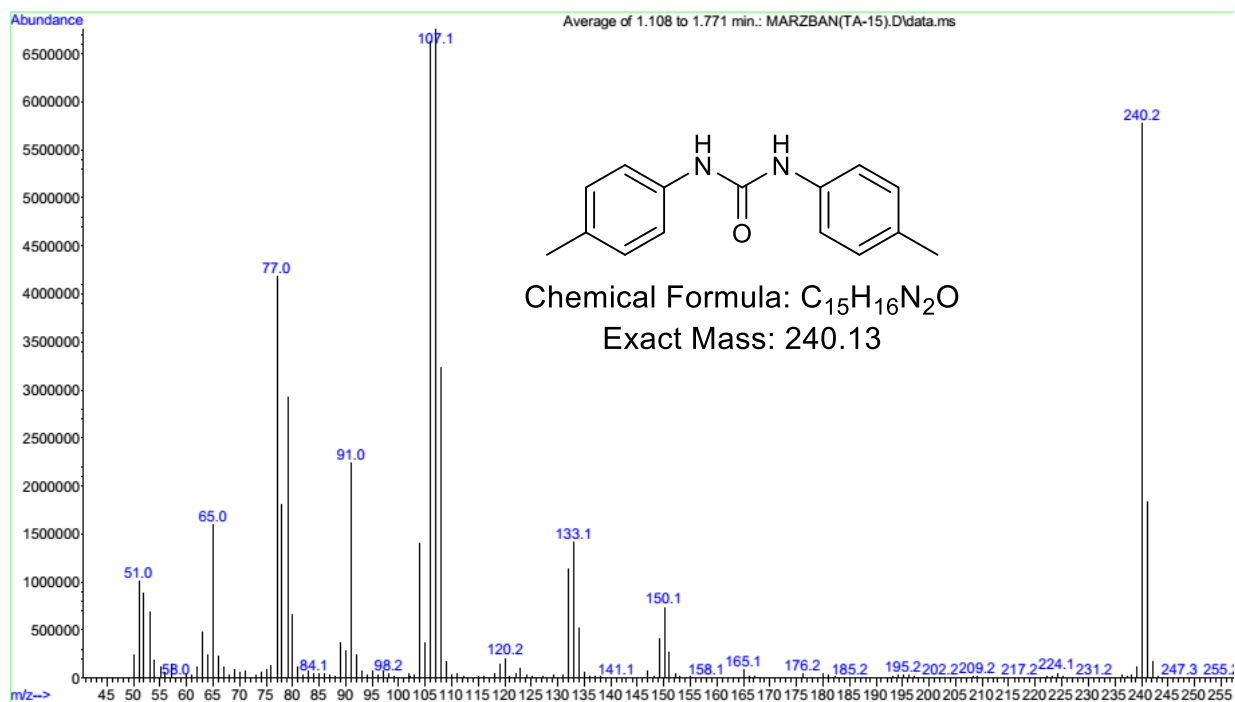

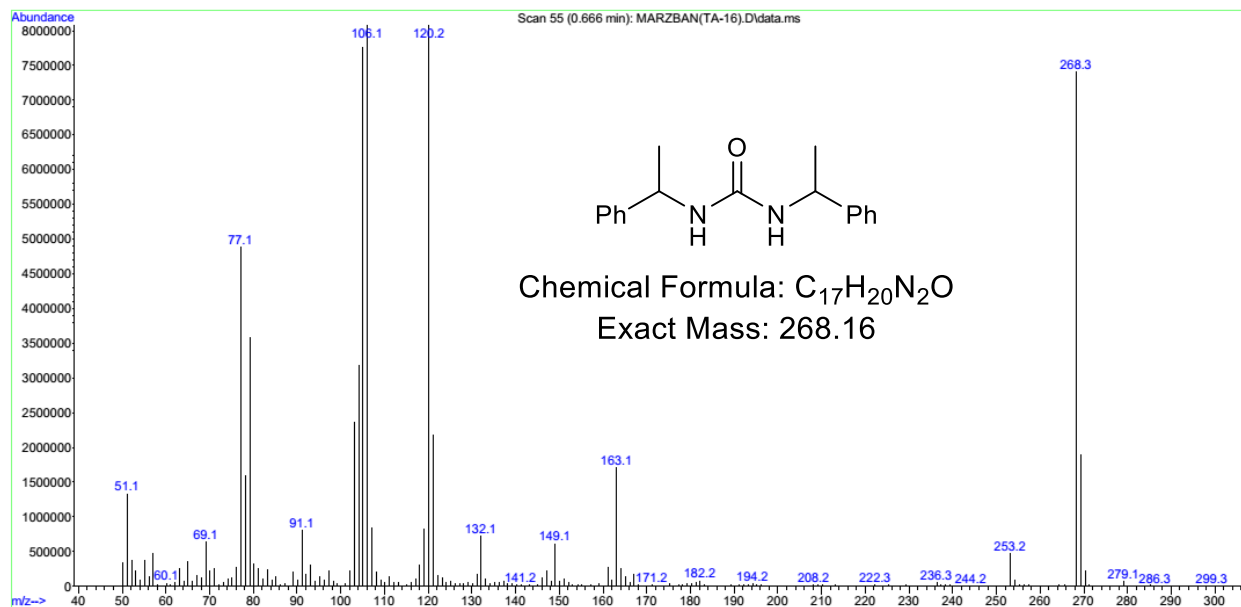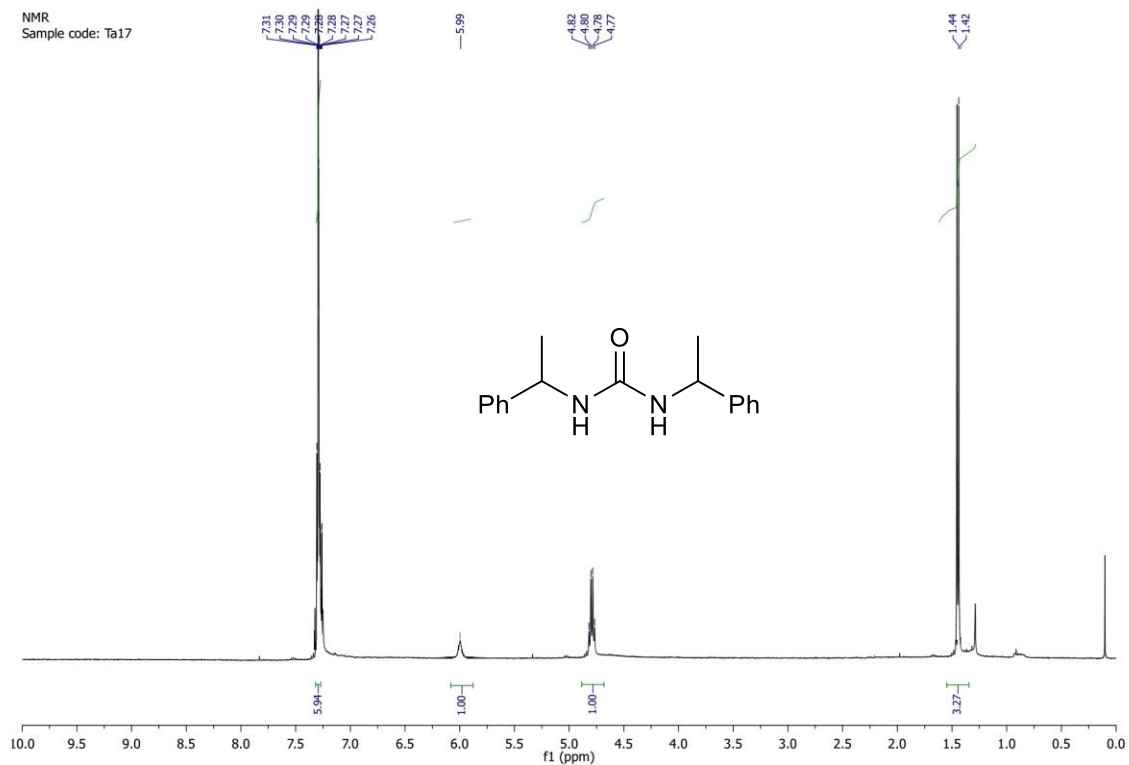

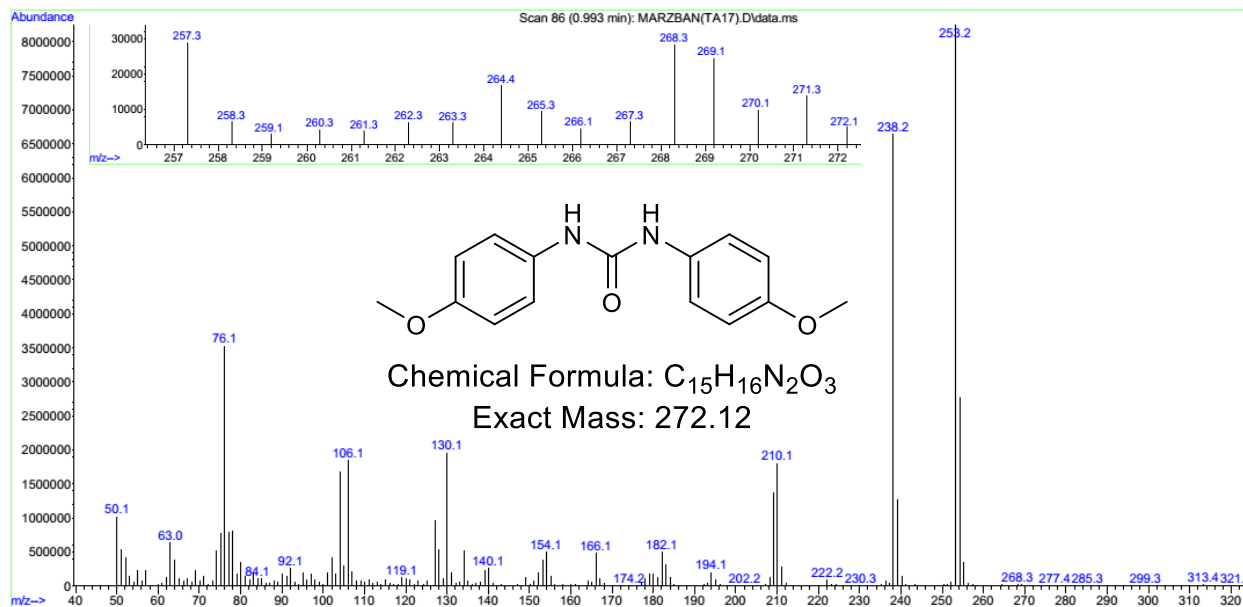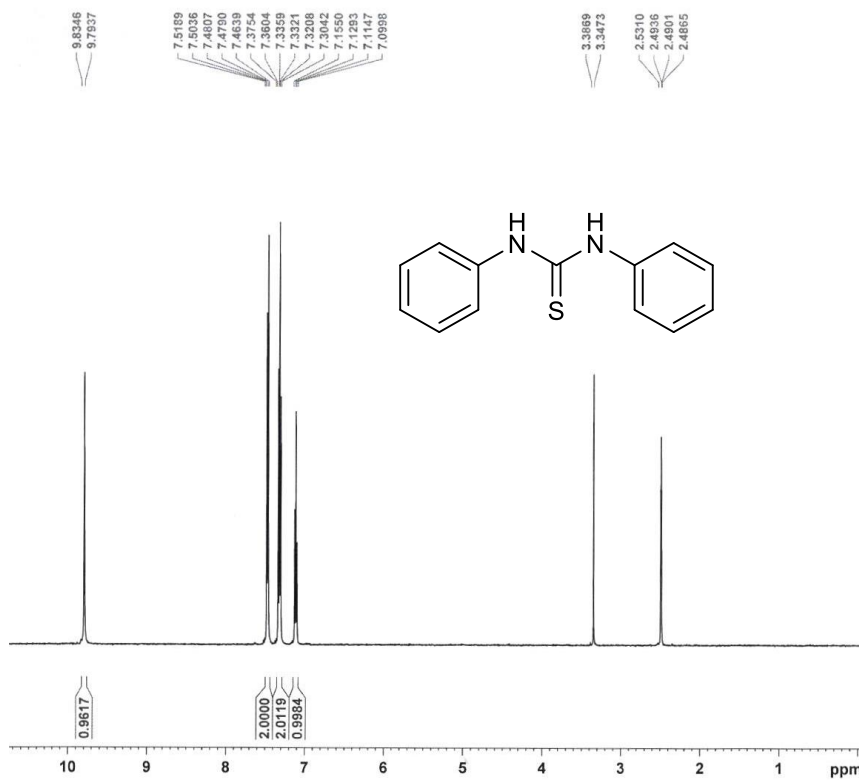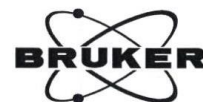

Current Data Parameters

NAME Arefi  
EXPMO 1  
PROCNO 1

F2 - Acquisition Parameters

Date\_ 800204  
Time\_ 6.30  
INSTRUM spect  
PROBHD 5 mm Multinucl  
FULPROG zg  
TD 32768  
SOLVENT DMSO  
NS 8  
DS 0  
SWH 10330.578 Hz  
FIDRES 0.315264 Hz  
AQ 1.5860696 sec  
RG 1625.5  
EW 48.400 use  
DE 6.00 use  
TE 300.0 K  
DL 6.0000000 sec  
TDO 1

===== CHANNEL f1 =====

HUCL 1H  
P1 15.00 use  
PL1 1.00 dB  
SFO1 500.1330885 MHz

F2 - Processing parameters

SI 32768  
SF 500.1300101 MHz  
WDW EM  
SSB 0  
LB 0.30 Hz  
GB 0  
PC 1.00

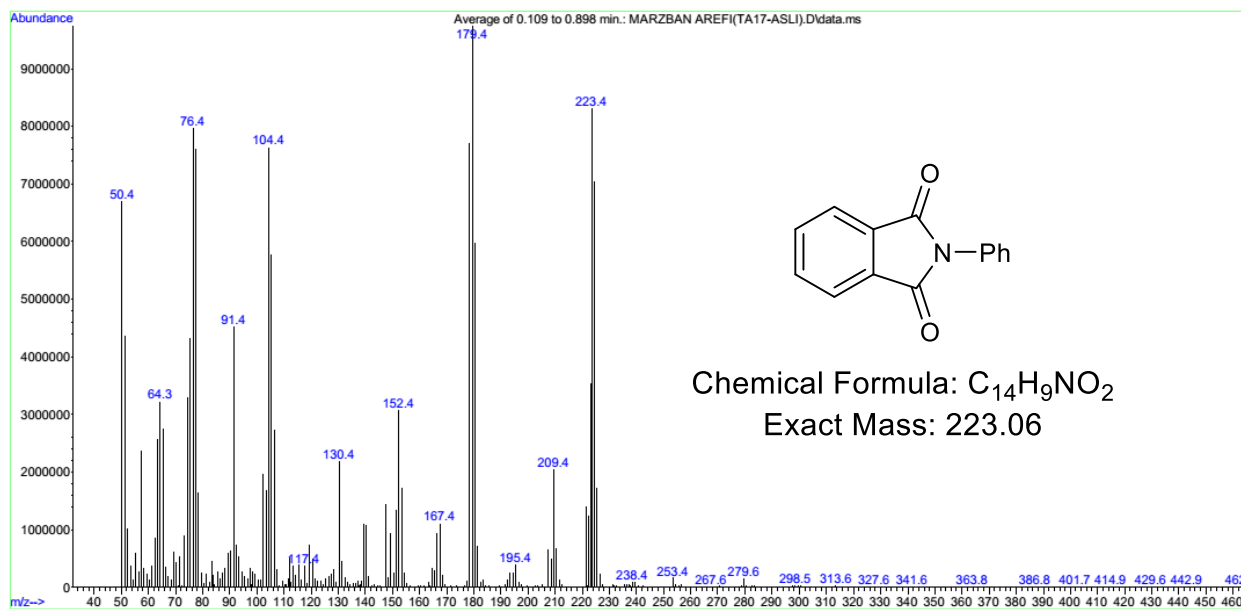

NMR  
Sample code: Ta16

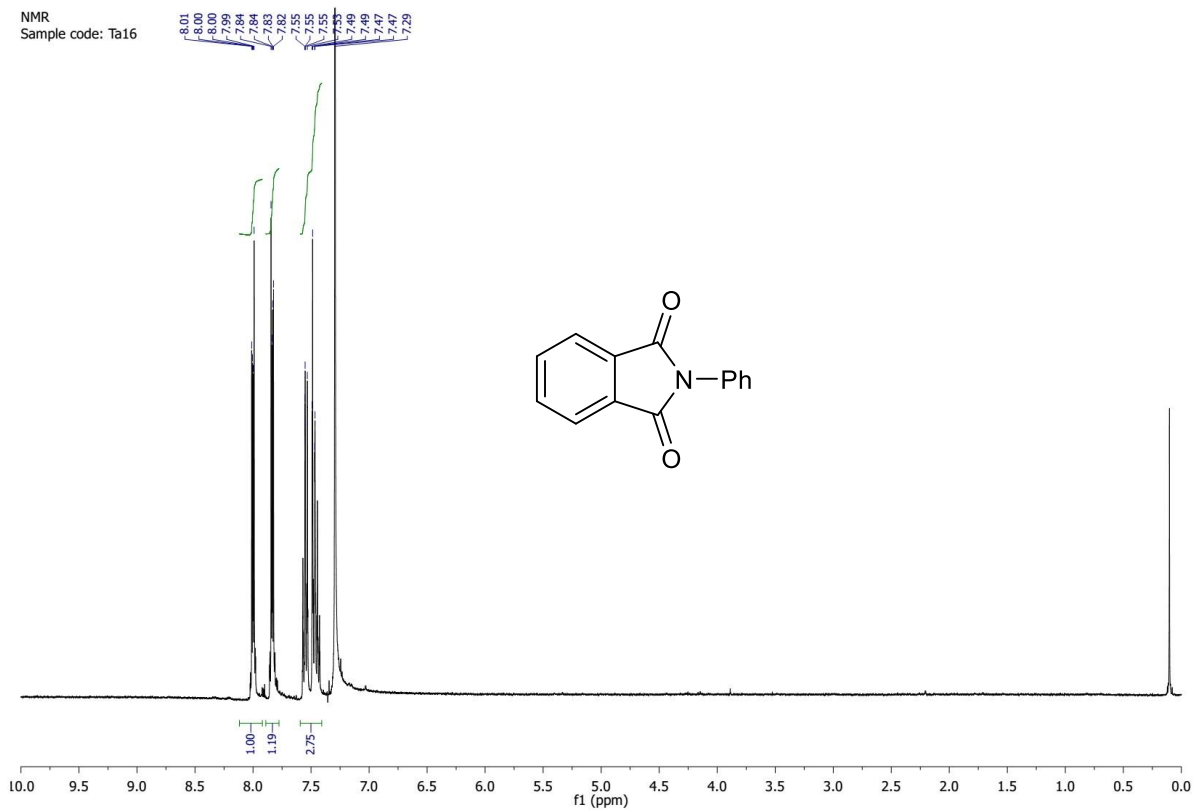

Supplement: c5ra27680b1.pdf [file c5ra27680b1.pdf]
